# Supplementary material
Source: Springer Nature journal article supplement (https://www.springermedizin.de/resource/supplementary/12974_2009_212_MOESM4_ESM.pdf/9601008)

**A**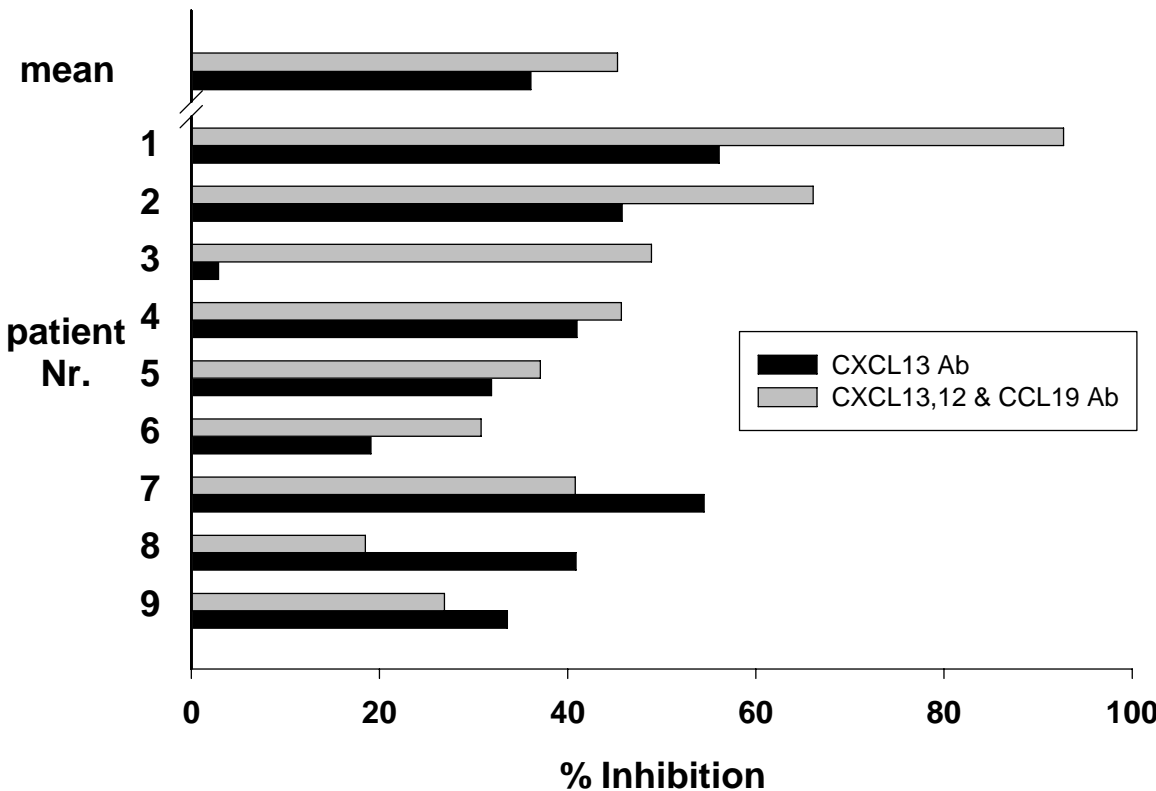**B**

patient Nr. 3

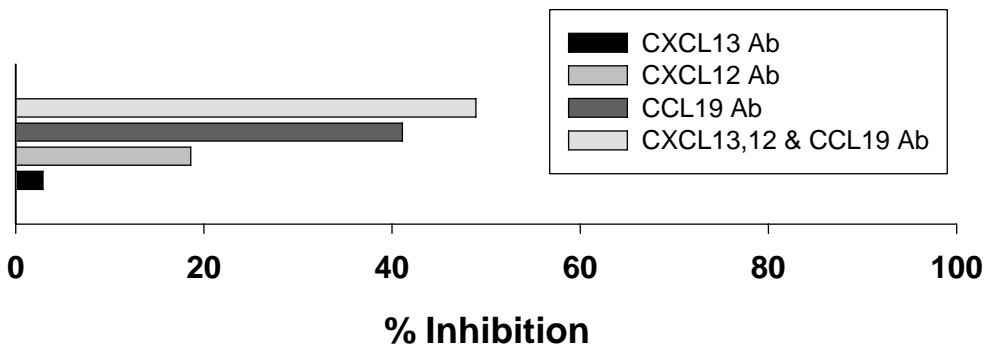

Supplement: MOESM4 [file 9601008]
